# Supplementary material
Source: HighWire-hosted journal article supplement (https://bmjopen.bmj.com/content/9/5/e023804)
Supplement: inline-supplementary-material-1 [file inline-supplementary-material-1.xlsx]

## Sheet: Independent observations of web
DISCERN Score - Observer 1 (BH)	JAMA Score - Observer 1 (BH)	DISCERN Score - Observer 2 (PB)	JAMA Score - Observer 2 (PB)
52	2	34	2
53	2	45	3
46	1	32	3
46	3	34	2
36	2	36	2
42	1	49	1
62	3	57	2
35	2	61	2
32	0	42	1
56	3	63	2
26	2	31	2
51	2	30	1
54	3	47	4
24	1	20	2
43	1	39	1
32	1	26	0
25	1	27	1
30	0	21	0
29	0	21	0
23	1	38	2
19	1	18	0
39	0	26	0
56	0	44	0
44	0	34	0
50	0	40	0
40	2	54	2
45	2	28	1
45	1	44	0
38	1	35	1
38	2	24	2
49	2	36	0
41	1	41	2
38	1	28	1
42	4	29	3
36	1	23	0
41	1	22	0
34	0	19	0
37	0	16	0
45	1	31	1
35	1	24	0
42	3	35	1
33	0	20	0
53	4	32	1
39	0	32	0
37	0	30	0
40	3	21	2
26	0	28	0
28	0	20	0
27	1	27	0
55	3	52	4
42	0	36	0
46	2	40	0
45	2	49	2
34	1	28	1
39	0	50	0
50	3	75	1
40	1	31	1
51	3	63	1
45	2	56	2
40	1	54	1
47	1	55	1
42	1	44	1
48	2	57	2
26	1	22	1
44	1	55	1
